# Supplementary material for: Genetic Determinants of Tigecycline Resistance in Mycobacteroides abscessus
Source: MDPI journal article supplement (doi:10.3390/antibiotics11050572), 2022-04-25
Supplement: s1 [file s1]

# Genetic Determinants of Tigecycline Resistance in *Mycobacteroides abscessus*

Hien Fuh Ng and Yun Fong Ngeow\*

Centre for Research on Communicable Diseases, Faculty of Medicine and Health Sciences, Universiti Tunku Abdul Rahman, Selangor, Malaysia; hfng@utar.edu.my  
\* Correspondence: ngeowyf@utar.edu.my; Tel.: +603-9086 0288 (ext: 158)

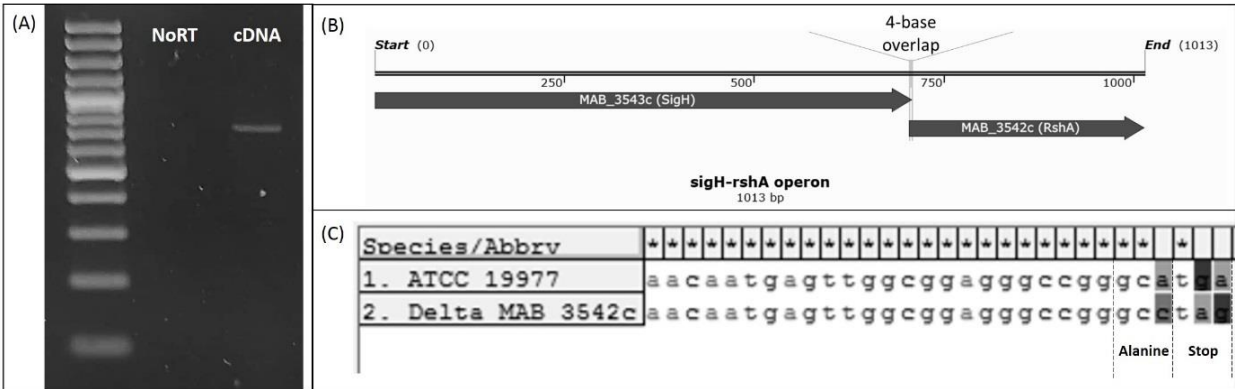

**Figure S1.** (A) The *sigH* (*MAB\_3543c*) and *rshA* (*MAB\_3542c*) genes are transcribed as an operon. RT-PCR analysis with the forward primer annealed to the *MAB\_3543c* gene and the reverse primer annealed to the *MAB\_3542c* gene. cDNA was prepared from the RNA of ATCC 19977. NoRT: no-reverse transcription control. (B) Both genes are neighbor genes in the ATCC 19977 genome with a 4-base overlap. (C) Partial DNA sequences of *MAB\_3543c* from ATCC 19977 and  $\Delta$ MAB\_3542c.
